# Supplementary material for: Nonlinear optical properties of novel fullerene–ferrocene hybrid moleculesElectronic supplementary information (ESI) available: complete experimental procedure, including NMR, FTIR, MS, elemental analysis/HRMS, cyclic voltammetric and UV-vis absorption data for 1–3. See http://www.rsc.org/suppdata/jm/b2/b211019a/
Source: Royal Society of Chemistry journal article supplement (doi:10.1039/b211019a), 2003-01-13
Supplement: b211019a.doc [file b211019a.doc]

**Supplementary Information**

**Nonlinear Optical Properties of Novel Fullerene-Ferrocene Hybrid Molecules**

Norie Tsuboya,*a* Ryo Hamasaki,*a* Masateru Ito,*a* Masaya Mitsuishi,*b* Tokuji Miyashita*b* and Yoshinori Yamamoto**a*

*a* Department of Chemistry, Graduate School of Science, Tohoku University, Sendai 980-8578, Japan

*b* Institute for Multidisciplinary Research for Advanced Materials, Tohoku University, Katahira 2-2-1, Sendai 980-8577, Japan

**Experimental Section**

General Information.

Fluorescence spectra and UV-vis absorption spectra were measured with a Hitachi F- 4500 spectrofluorophotometer and Hitachi U-3000 UV-vis spectrometer, respectively. The HRS measurements were carried out by using a q-switched Nd:YAG laser (spectron LS-412, fwhm: 6 ns) as an incident light beam. The fundamental light intensity ( = 1064 nm, I ()) was varied by rotating a half-wave plate positioned between two polarizers. The HRS signal, I (2) was detected by a photomultiplier (Philips, model XP 2020Q) as a function of I (). Both incident fundamental light and HRS light signals were fed into two gated integrators (Stanford Research System, model SR250) and out-put signals from the gated integrators were A-D converted and analyzed on a personal computer. 1H NMR and 13C NMR spectra were recorded on a JEOL JNM AL-300 (300 MHz) and Brüker AM-600 (600 MHz) spectrometers. IR spectra were recorded on a SHIMADZU FTIR-8200A spectrometer. High resolution mass spectra were obtained on a JEOL JMS-HX110, JEOL JMS-AX500 and JEOL JMS-DX303 spectrometer. FAB mass spectra were obtained using a JEOL JMS-HX110 spectrometer using *m*-nitrobenzyl alcohol matrices. GC-MS analyses were performed on a Hewlett-Packard Model 6890 GC interfaced to a Hewlett Packard Model 5973 mass selective detector (30 m  0.25 mm capillary column, HP-5MS). Cyclic voltammetric measurements were carried out with BAS CV50W. Column chromatography was carried out employing silica gel 60 N (spherical, neutral, 40~100 m and 100~210 m, KANTO Chemical Co., Inc.) and aluminumoxide 90 (activity II~III, 63~200 m, Merck). Anhydrous solvents were purchased from Kanto Chemicals. Fullerene was commercially available and purchased from MER Corporation. All other reagents are commercially available and were used without further purification.

**Preparation of 2,2-Dibromo-1-ferrocenyl ethylene (5): (known product)**

To a solution of triphenylphosphine (6.8 g, 26 mol) and carbontetrabromide (4.3 g, 13 mmol) in 12 ml of dichloromethane was added a solution of ferrocenecarboxyaldehyde **4** (1.4 g, 6.5 mmol) in 5 ml of dichloromethane at 0 ˚C. The mixture was stirred for 15 min and filtered through a celite pad. The filtrate was evaporated and passed through a short silica gel column (hexane : ethyl acetate = 5:1). **5** was obtained quantitatively (2.4 g). **5**; orange solid; 1H NMR (300 MHz, CDCl3) 7.14 (s, 1H), 4.65 (t, *J* = 1.9 Hz, 2H), 4.29 (t, *J* = 1.9 Hz, 2H), 4.19 (s, 5H); 13C NMR (75 MHz, CDCl3) 135.5, 83.5, 79.6, 69.3, 69.2, 69.0.

**Preparation of Ethynylferrocene (6)**: **(known product)**

To a solution of **5** (5.5 g, 15 mmol) in 40 ml of THF was added a hexane solution of *n*-BuLi (18.75 ml, 1.6 M, 30 mmol) at –78 ˚C. The mixture was stirred for 1 h at –78 ˚C and then for 1 h at room temperature. The reaction was quenched by addition of H2O and the reaction product was extracted with ether. The combined organic layer was washed with brine and dried over Na2SO4 , then evaporated. The residue was passed through a short column (silica gel, hexane) and the product was purified by recrystalization. **6** was obtained in 77% yield (2.2 g, 10.5 mmol) as a orange crystal. **6**; 1H NMR (300 MHz, CDCl3)  (s, 2H), 4.20 (s, 5H), 4.18 (s, 2H), 2.70 (s, 1H); 13C NMR (75 MHz, CDCl3) 82.6, 73.5, 71.7, 70.0, 68.7, 63.8.

**Preparation of (*E*)-2-(4-Bromophenyl)-1-ferrocenyl ethylene (8a) and (*Z*)-2-(4-Bromophenyl)-1-ferrocenyl ethylene (8b):**

To a solution of (ferrocenylmethyl)triphenylphosphonium iodide **7** (19.4 g, 33 mmol) in 200 ml of THF was cooled to –78 ˚C. A hexane solution of *n*-BuLi (19.7 ml, 1.52 M, 30 mmol) was added and the resulting mixture was stirred for 2 h at 0 ˚C. A solution of 4-bromobenzaldehyde (5.6 g, 30 mmol) in 120 ml of THF was added at 0 ˚C over 30 min, and the resulting mixture was stirred for 4 h at 0 ˚C and then for 16 h at room temperature. The reaction was quenched by addition of H2Oandthe product wasextracted with ether. The combined organic layer was washed with brine and dried over Na2SO4, then evaporated. The residue was passed through a silica gel short column (hexane : ethyl acetate = 3:1) and **8** was obtained in 76% yield (8.4 g, 22.8 mmol) as a mixture of stereoisomers (E : Z = 41 : 59). The mixture was separated by recrystalization. **8a :** orange solid; 1H NMR (300 MHz, CDCl3)  7.41 (d, *J* = 8.6 Hz, 2H), 7.27 (d, *J* = 8.6 Hz, 2H), 6.85 (d, *J* = 16.1 Hz, 1H), 6.60 (d, *J* = 16.1 Hz, 1H), 4.43 (t, *J* = 1.8 Hz, 2H), 4.27 (t, *J* = 1.8 Hz, 2H), 4.12 (s, 5H); 13C NMR (75 MHz, CDCl3)  136.8, 131.7, 127.9, 127.2, 124.7, 120.2, 82.9, 69.22, 69.21, 66.9. **8b:** orange solid; 1H NMR (300 MHz, CDCl3)  7.40 (d, *J* = 8.4 Hz, 2H), 7.21 (d, *J* = 8.4 Hz, 2H), 5.30 (s, 2H), 4.20 (s, 4H), 4.13 (s, 5H); 13C NMR (75 MHz, CDCl3)  137.1, 131.2, 130.4, 129.0, 125.9, 120.30, 81.2, 69.49, 69.42, 68.8; IR (KBr) 3076, 3018, 1717, 1697, 1636, 1485, 1460, 1406, 1387, 1252, 1103, 1069, 1040, 1011, 872, 826, 808, 746, 527 cm-1; HRMS (EI) Calcd for C18H15FeBr: 365.9706. Found: 365.9702.

**Preparation of (*E*)-1-Ferrocenyl-2-[4-(2-trimetylsilyletyhnyl)phenyl] ethylene (9a) and (*Z*)-1-Ferrocenyl-2-[4-(2-trimetylsilyletyhnyl)phenyl] ethylene (9b)**:

To a solution of **8a** (3.1 g, 8.5 mmol), Pd(PPh3)4 (294 mg, 0.26 mmol) and CuI (97.1 mg, 0.51 mmol) in 30 ml of triethylamine was added trimethylsilylacetylene (1.44 ml, 10.2 mmol) and the mixture was refluxed. The mixture was stirred for 2.5 h and then cooled down. The mixture was quenched by addition of H2Oandthe product wasextracted with ether. The combined organic layer was washed with brine and dried over Na2SO4, then evaporated. The residue was passed through a silica gel short column (hexane : ethyl acetate = 50:1) and purified by recrystalization. **9a** was obtained in 92 % yield (3.0 g, 7.8 mmol). **9a**: orange solid; 1H NMR (300 MHz, CDCl3)  7.39 (d, *J* = 8.2 Hz, 2H), 7.32 (d, *J* = 8.2 Hz, 2H), 6.87 (d, *J* = 16.0 Hz, 1H), 6.62 (d, *J* = 16.0 Hz, 1H), 4.45 (s, 2H), 4.29 (s, 2H), 4.13 (s, 5H); 13C NMR (75 MHz, CDCl3)  138.0, 132.3, 128.3, 125.4, 125.2, 121.0, 105.4, 94.6, 82.9, 69.2, 57.0; IR (KBr) 3080, 3030, 2957, 2897, 2156, 1633, 1599, 1506, 1410, 1250, 1105, 1041, 1028, 1001, 962, 862, 841, 820, 758, 635, 542 cm-1; HRMS (EI) Calcd for C23H24FeSi: 384.0997. Found: 384.0971; Anal. Calcd for C23H24FeSi: C, 71.87; H, 6.29. Found: C, 71.70; H, 6.30.

**9b** was prepared in a similar way as shown above. **9b**: orange solid; 1H NMR (300 MHz, CDCl3)  7.36 (d, *J* = 8.2 Hz, 2H), 7.25 (d, *J* = 8.2 Hz, 2H), 6.34 (m, 2H), 4.13 (s, 4H), 4.07 (s, 5H), 0.23(s, 9H); 13C NMR (75 MHz, CDCl3)  138.6, 131.7, 129.1, 128.6, 126.4, 121.0, 105.3, 94.2, 81.0, 69.5, 69.3, 68.7, 0.0; IR (KBr) 3080, 3026, 2955, 2897, 2152, 1728, 1628, 1506, 1499, 1466, 1402, 1250, 1221, 1105, 1036, 1001, 860, 845, 816, 756, 719, 698, 637, 550 cm-1; HRMS (EI) Calcd for C23H24FeSi: 384.0997. Found 384.0983; Anal. Calcd for C23H24FeSi: C, 71.87; H, 6.29. Found: C, 71.92; H, 6.10.

**Preparation of (*E*)-2-(4-Ethynylphenyl)-1-ferrocenyl ethylene (10a) and (*Z*)-2-(4-Ethynylphenyl)-1-ferrocenyl ethylene (10b)**:

To a solution of **9a** (2.7 g, 7 mmol) in 14 ml of methanol and 30 ml of THF was added potassium fluoride (606 mg, 10.5 mmol) and the mixture was stirred for 8 h. The mixture was quenched by addition of H2Oandthe product wasextracted with ether. The combined organic layer was washed with brine and dried over Na2SO4 , then evaporated. The residue was purified by recrystalization and compound **10a** was obtained in 84 % yield (1.84g, 5.9 mmol). **10a:** orange solid; 1H NMR (300 MHz, CDCl3)  7.43 (d, *J* = 8.4 Hz, 2H), 7.35 (d, *J* = 8.4 Hz, 2H), 6.89 (d, *J* = 16.1 Hz, 1H), 6.65 (d, *J* = 16.1 Hz, 1H), 4.45 (t, *J* = 1.8 Hz, 2H), 4.29 (t, *J* = 1.8 Hz, 2H), 4.12 (s, 5H), 3.10 (s, 1H); 13C NMR (75 MHz, CDCl3)  138.4, 132.4, 128.5, 125.6, 125.2, 120.0, 83.9, 83.1, 77.5, 69.4, 67.0.

**10b** was prepared in a similar way as above. **10b:** orange solid; 1H NMR (300 MHz, CDCl3)  7.38 (d, *J* = 8.3 Hz, 2H), 7.27 (d, *J* = 8.3 Hz, 2H), 6.35 (m, 2H), 4.15 (s, 4H), 4.08 (s, 5H), 3.06 (s, 1H); 13C NMR (75 MHz, CDCl3)  138.9, 131.8, 129.2, 128.7, 126.3, 120.0, 83.9, 81.0, 77.4, 69.5, 69.3, 68.8.

Representative Procedure for the Reaction of Fullerene with Acetylene.

A solution of a lithiated acetylene was prepared by adding of 0.96 ml of 1.56 M *n*-BuLi in hexane to a stirred solution of 10b (468mg, 1.5 mmol) in 5 ml of THF and the mixture was stirred at 0 ˚C for 0.5 h. In a 100 ml three-necked flask was placed C60 (360mg, 0.5 mmol) in 20 ml of THF, and was dispersed by sonication in an ultrasonic bath for 40 min. To the vigorously stirred suspension of finely dispersed C60 in THF was added a solution of the lithiated acetylene dropwise by the use of cannula. After 10 min, the resulting dark green solution was treated with excess 1N HCl. The mixture was evaporated and purified by column chromatography as follows (silica gel). At first, the unchanged C60 and 10b were removed by the use of hexane and ethyl acetate. Next, the product was obtained using toluene as an eluent. The product was further purified by column chromatography (silica gel, hexane : toluene = 10:1) and 3 was obtained in 17% yield (86.1 mg, 0.083 mmol). The reaction conditions and yields of other compounds are described in Table 1.

**1-Ferrocenylethynyl-2-hydro-1,2-dihydro-[60]fullerene (1) :** black solid; 1H NMR (600 MHz, CDCl3/CS2)  7.05 (s, 1H), 4.68 (t, *J* = 1.8 Hz, 2H), 4.33 (s, 5H), 4.31 (t, *J* = 1.8 Hz, 2H); 13C NMR (150 MHz, CDCl3/CS2)  151.70, 151.55, 147.57, 141.30, 146.61, 146.35, 146.18, 146.16, 145.76, 145.62, 145.59, 145.46, 145.38, 145.31, 144.66, 144.51, 143.17, 142.98, 142.56, 142.54, 142.09, 142.02, 141.97, 141.93, 141.68, 141.58, 140.40, 140.27, 136.13, 134.98, 88.82, 82.92, 71.98, 70.31, 69.25, 64.24, 61.93, 55.29; FAB MS *m/z* (930, M+) and intense peak at 720 (C60).

**(*E*)-1-{4-[(2-Ferrocenyl)ethenyl]phenylethynyl}-2-hydro-1,2-dihydro[60]fullerene (2) :** black solid; 1H NMR (600 MHz, CDCl3/CS2)  7.71 (d, *J* = 8.0 Hz, 2H), 7.47 (d, *J* = 8.0 Hz, 2H), 7.13 (s, 1H), 6.95 (d, *J* = 16.1 Hz, 1H), 6.69 (d, *J* = 16.1 Hz, 1H), 4.48 (s, 2H), 4.31 (s, 2H), 4.14 (s, 2H); 13C NMR (150 MHz, CDCl3/CS2)  151.51, 151.36, 147.58, 147.31 146.64, 146.38, 146.37, 146.20, 146.20, 146.19, 145.79, 145.66, 145.47, 145.41, 145.33, 144.68, 144.51, 143.19, 143.00, 142.58, 142.56, 142.11, 142.03, 142.00, 141.89, 141.69, 141.60, 140.38, 140.32, 138.47, 136.11, 135.13, 132.43, 128.74, 125.83, 125.28, 120.37, 92.79, 84.15, 69.68, 69.61, 67.26, 61.91, 55.23; FAB MS *m/z* (1033, M+) and intense peak at 720 (C60).

**(*Z*)-1-{4-[(2-Ferrocenyl)ethenyl]phenylethynyl}-2-hydro-1,2-dihydro[60]fullerene (3):** black solid; 1H NMR (600 MHz, CDCl3/CS2)  7.67 (d, *J* = 7.9 Hz, 2H), 7.42 (d, *J* = 7.9 Hz, 2H), 7.12 (s, 1H), 6.42 (d, *J* = 11.8 Hz, 1H), 6.35 (d, *J* = 11.8 Hz, 1H), 4.24 (s, 2H), 4.22 (s, 2H), 4.13 (s, 5H); 13C NMR (150 MHz, CDCl3/CS2)  151.49, 151.35, 147.59, 147.32, 146.64, 146.39, 146.37, 146.21, 146.20, 145.80, 145.65, 145.48, 145.42, 145.34, 144.68, 144.51, 143.20, 142.59, 142.56, 142.11, 142.04, 142.00, 141.88, 141.69, 141.61, 140.39, 140.33, 138.95, 136.10, 135.13, 131.82, 129.44, 128.98, 126.44, 120.44, 92.44, 84.07, 69.85, 69.32, 31.90, 55.18;FAB MS *m/z* (1032, M+).

**Cyclic Voltammogram of 1-3**

**
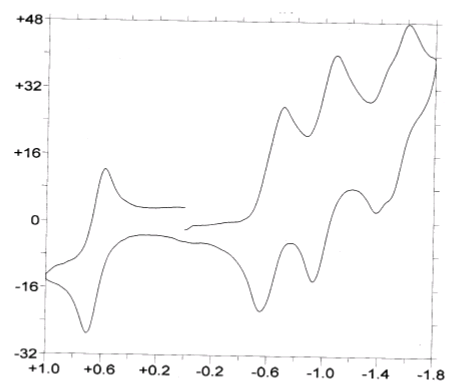
**


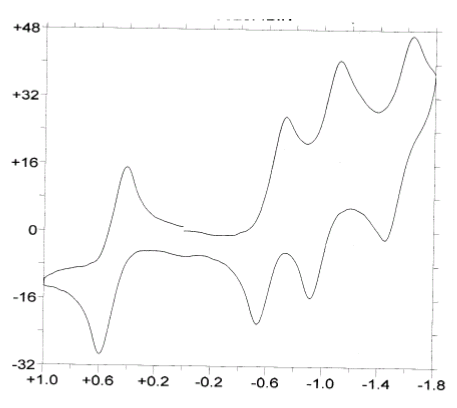


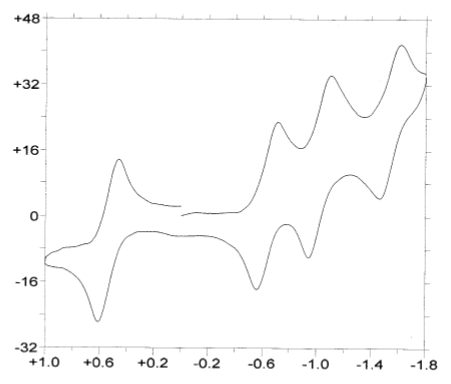


All potentials are relative to SCE in dry *o*-dichlorobenzene using a platinum-bead working electrode; 0.1 mol cm-3 NBu4ClO4 as supporting electrolyte; scan rate: 100 mV s-1.

# UV-Vis absorption spectra of 1-3

All absorption spectra were recorded 1.0 x 10-5 M in CHCl3 at ambient temperature.
